# Supplementary material for: Outpatient geriatric health care in the German federal state of Mecklenburg-Western Pomerania: a population-based spatial analysis of claims data
Source: PubMed Central journal article supplement (PMC11010346; doi:10.1186/s12913-024-10888-2), 2024-04-12
Supplement: 12913_2024_10888_MOESM1_ESM.pdf [file 12913_2024_10888_MOESM1_ESM.pdf]

Table A1: Synoptic overview about the most important key facts of basic geriatric care (BGC) and specialized geriatric care (SGC) in Germany and Mecklenburg-Western Pomerania (MWP).

|                                         | <b>Basic Geriatric Care (BGC)</b>                                                                                                                                                                                                                                                                                                    | <b>Specialized Geriatric Care (SGC)</b>                                                                                                                                                                                                                                                                                                                                        |
|-----------------------------------------|--------------------------------------------------------------------------------------------------------------------------------------------------------------------------------------------------------------------------------------------------------------------------------------------------------------------------------------|--------------------------------------------------------------------------------------------------------------------------------------------------------------------------------------------------------------------------------------------------------------------------------------------------------------------------------------------------------------------------------|
| <b>Comprised Services</b>               | Basic Geriatric Assessment (BGA)<br>Basic Geriatric Treatment (BGT)                                                                                                                                                                                                                                                                  | Comprehensive Geriatric Assessment (CGA)<br>Comprehensive Geriatric Treatment (CGT)                                                                                                                                                                                                                                                                                            |
| <b>Addressed Patients</b>               | <ul style="list-style-type: none"> <li>Age <math>\geq 70</math> and one geriatric syndrome (see table 1) or an approved care level according to the statutory long-term insurance</li> <li>Patients at any age diagnosed with Alzheimer disease, Dementia, or Parkinson</li> </ul>                                                   | <ul style="list-style-type: none"> <li>Age <math>\geq 70</math> and two geriatric syndrome (see table 1) or one geriatric syndrome and an approved care level according to the statutory long-term insurance</li> </ul>                                                                                                                                                        |
| <b>Authorized healthcare providers</b>  | <ul style="list-style-type: none"> <li>General practitioners (GP)</li> </ul>                                                                                                                                                                                                                                                         | <ul style="list-style-type: none"> <li>Specialized geriatric practitioners (SP)</li> <li>General practitioners (GP) with an additional qualification in geriatrics</li> <li>Geriatric inpatient ambulances (GIA) or hospital doctors authorized for taking part in the outpatient geriatric care by the Association of Statuary Health Insurance Physicians (ASHIP)</li> </ul> |
| <b>Content</b>                          | <ul style="list-style-type: none"> <li>Standardized Assessment and Monitoring of several health dimensions of the patient (e.g., cognition, mobility, social situation, etc.)</li> <li>Prescription, coordination and management of therapies</li> <li>The GP monitors the therapy progress and the patients' medications</li> </ul> | <ul style="list-style-type: none"> <li>Comprehensive standardized Assessment of the health and social situation of the patient</li> <li>Team-based approach towards the definition and monitoring of treatment goals and a treatment plan, including frequent case conferences of the SP and other involved physicians, therapists or caregivers.</li> </ul>                   |
| <b>Reimbursement Codes</b>              | GOP 03360: BGA<br>GOP 03362: BGT<br>GOP 30980: Consultation with SP in order to determine the need for a CGA<br>GOP 30988: SGT based on the results of a CGA                                                                                                                                                                         | GOP 30981: Consultation with GP in order to determine the need for a CGA<br>GOP 30984-30986: CGA and additional charge if a more extensive CGA is needed<br>GOP 30988: SGT based on the results of a CGA<br>GOP 01321: Fixed rate for GIA                                                                                                                                      |
| <b>Eligible Patients in MWP in 2017</b> | 221,654 patients (75.3% of all inhabitants of Mecklenburg-Western Pomerania aged $\geq 70$ years)                                                                                                                                                                                                                                    | 95,171 patients (32.3% of the population of Mecklenburg-Western Pomerania $\geq 70$ years)                                                                                                                                                                                                                                                                                     |
| <b>Prevalence MWP in 2017</b>           | BGA: 113,581 patients (38,6 % of the inhabitants aged 70 years or older in MWP)<br>BGT: 118,755 patients (40,3 % of the inhabitants aged 70 years or older in MWP)                                                                                                                                                                   | CGA: 129 patients (0,04 % of the inhabitants aged 70 years or older in MWP)<br>CGT: 89 patients (0,03 % of the inhabitants aged 70 years or older in MWP)                                                                                                                                                                                                                      |
