# Supplementary material for: Outpatient geriatric health care in the German federal state of Mecklenburg-Western Pomerania: a population-based spatial analysis of claims data
Source: PubMed Central journal article supplement (PMC11010346; doi:10.1186/s12913-024-10888-2), 2024-04-12
Supplement: 12913_2024_10888_MOESM2_ESM.pdf [file 12913_2024_10888_MOESM2_ESM.pdf]

# Outpatient Geriatric Health Care in Germany – Reimbursement schemes

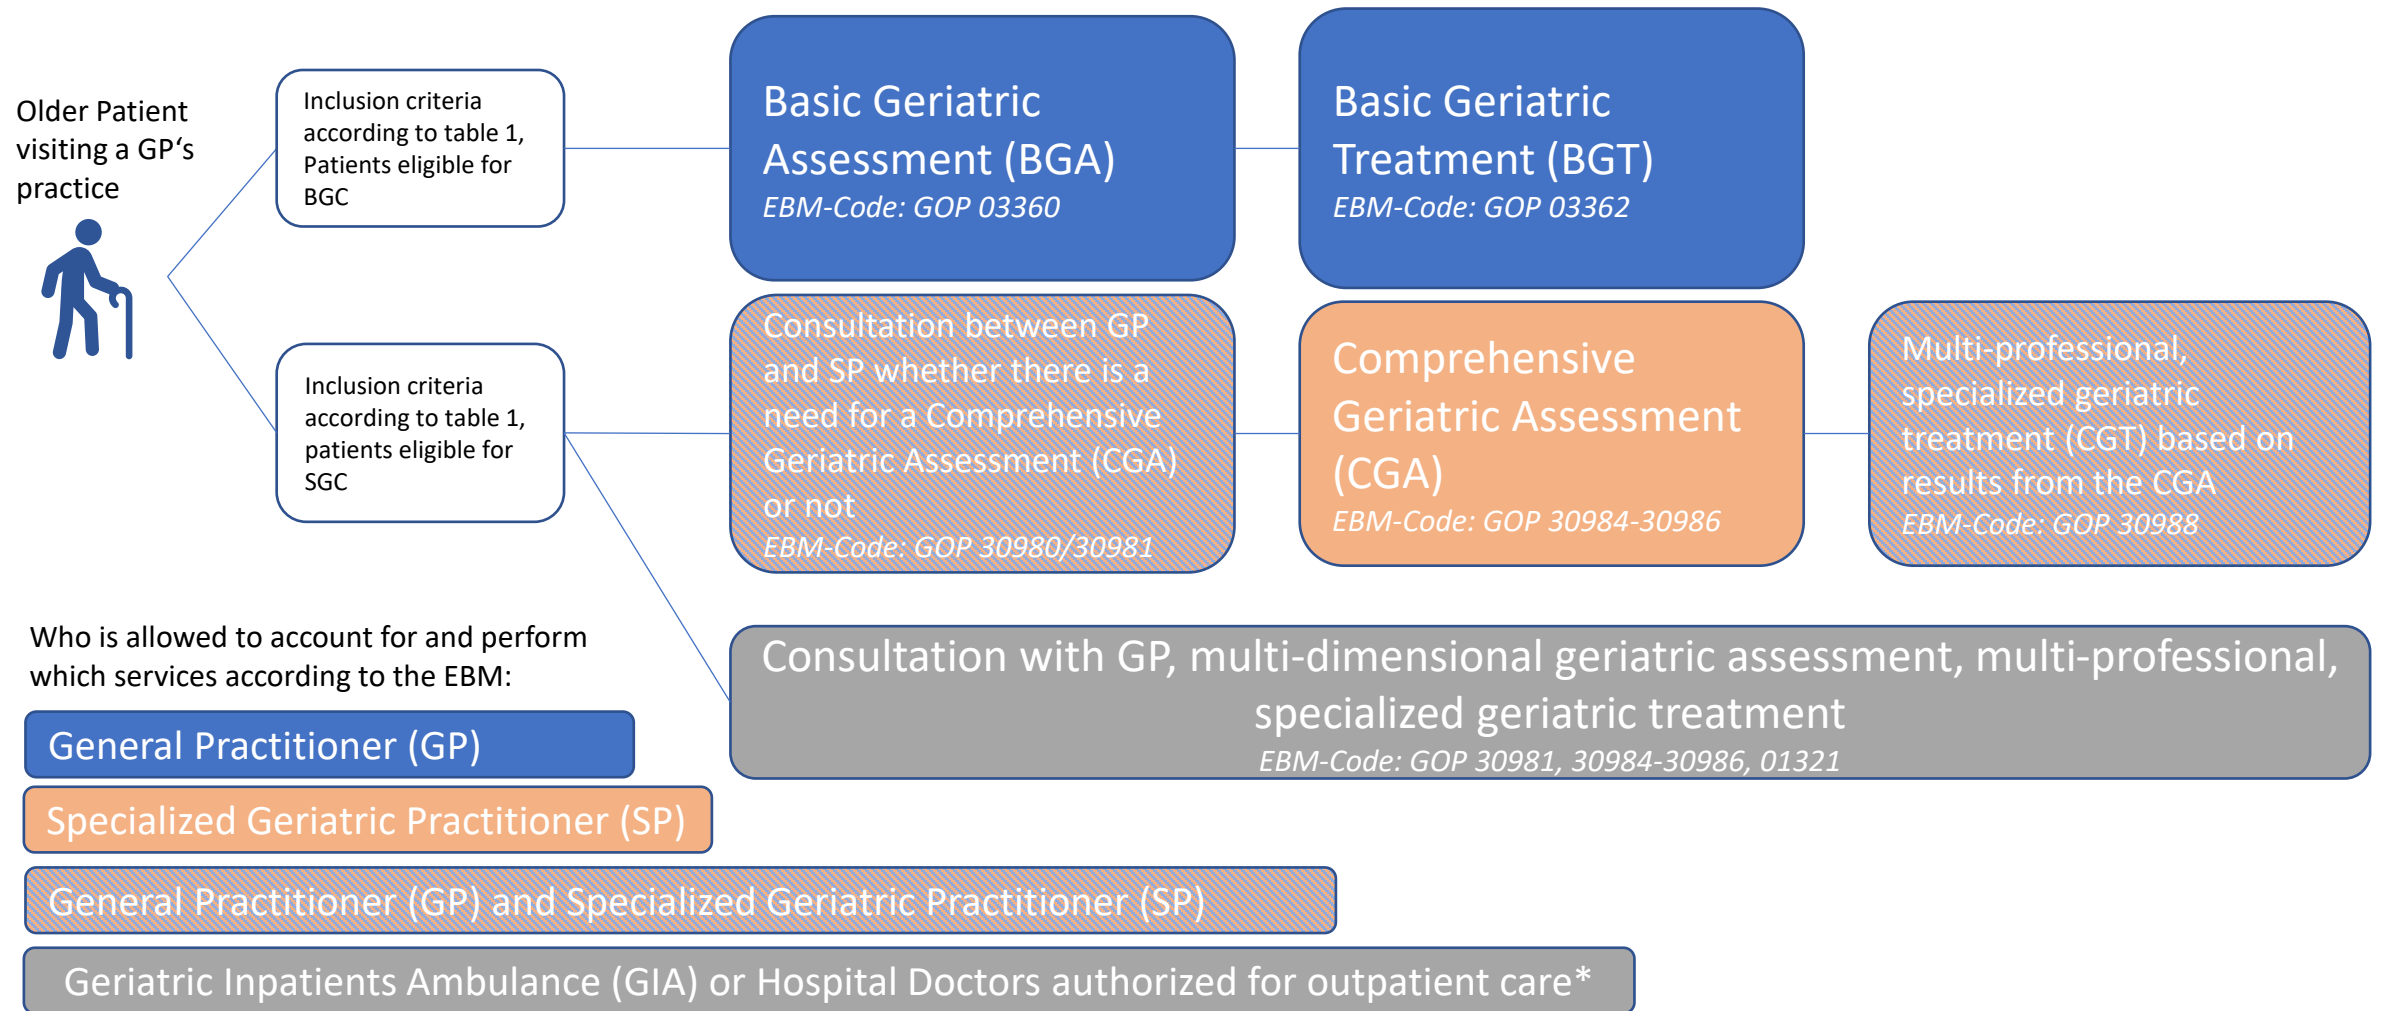

Figure A2: Definitions of geriatric patients applied by the ASHIP-MWP according to the national ASHIP reimbursement catalogue (EBM) that determines which services can be provided to which kind of geriatric patient. BGC – Basic Geriatric Care, SGC – Specialized Geriatric Care.

\*Not existing in Mecklenburg-Western Pomerania
